# Supplementary material
Source: PubMed Central journal article supplement (PMC6125507)
Supplement: zac009187402s1.pdf [file zac009187402s1.pdf]

1 **Cas9/CRISPR genome editing to demonstrate the contribution of Cyp51A Gly138Ser to**  
2 **azole resistance in *Aspergillus fumigatus***

3  
4  
5 **Supplementary data**

6  
7 ***A. fumigatus* media.** *A. fumigatus* cultures were routinely grown in *Aspergillus* minimal  
8 medium (AMM: 10 g glucose, 0.516 g KCl, 0.516 g MgSO<sub>4</sub>·7H<sub>2</sub>O, 1.516 g KH<sub>2</sub>PO<sub>4</sub>, 1.516 g  
9 Mg(NO<sub>3</sub>)<sub>2</sub>·6H<sub>2</sub>O, 1 mL trace elements (1) in 1 L distilled water), Czapek-Dox medium (CD,  
10 BD Difco Laboratories Inc., Franklin Lakes, NJ), YG medium (1), or potato dextrose agar  
11 medium (PDA, BD Difco). For solid medium, 1.5% agar was added. *A. fumigatus* conidia  
12 were obtained from mycelia cultured on AMM or PDA at 30°C for 3–7 days, harvested with  
13 PBS containing 0.05% (v/v) Tween 20 and 20% (v/v) glycerol, and filtered through a 40-µm  
14 nylon cell strainer (Greiner Bio-One, Germany).

15  
16 **DNA extraction, PCR, and sequencing.** Genomic DNA extractions and purifications were  
17 performed using a DNeasy Plant Mini Kit (QIAGEN, Germany). Primers for the  
18 amplification and sequencing of *cyp51A* are listed in **Table S1**. Identification was confirmed  
19 by sequencing of the internal transcribed spacer (ITS) and D1/D2 regions and the β-tubulin  
20 gene. PCR amplification of *cyp51A* was performed using NIID0345 genomic DNA as a  
21 template and primers Discheck5 and Discheck3 using Q5 Hot Start High-Fidelity 2× Master  
22 Mix (New England Biolabs, Ipswich, MA).

23  
24 **sgRNA *in vitro* synthesis.** We manually searched for target sequences consisting of  
25 G(N)15(A/T)(N)3NGG near the N-terminus (for sgRNA1) and C-terminus (for sgRNA2) as  
26 sgRNA target sequences and synthesized two oligonucleotides (T7-sgRNA1 and T7-  
27 sgRNA2, **Table S1**) consisting of the T7 promoter, sgRNA target sequence, and overlap  
28 sequence with Cas9 scaffold. These oligonucleotides were used for sgRNA synthesis via the

29 EnGen® sgRNA Synthesis Kit, *S. pyogenes* (New England Biolabs). The synthesized  
30 sgRNAs were purified using an RNA clean & concentrator-25 (Zymo Research, Irvine, CA),  
31 quantified using a QuantiFluor RNA system (Promega, Madison, WI) and Quantus  
32 Fluorometer (Promega), and used for ribonucleoprotein formation with Cas9.

33

34 **Repair templates.** A pHph plasmid harboring a hygromycin B resistance cassette (*hph*) was  
35 generated by deletion of two *loxP* sequences and HSV1 thymidine kinase sequences from  
36 pSK397 (2). Primers for the repair template construction are listed in **Table S1**. A region  
37 from 825-bp upstream to 1503-bp downstream of the *cyp51A* coding region was used for  
38 repair templates. The mutations and *hph* marker were introduced via PCR sewing or overlap  
39 extension PCR. The *hph* marker for selection of transformants was inserted between  
40 nucleotides 500 and 501 downstream of the *cyp51A* stop codon. Q5 Hot Start High-Fidelity  
41 2× Master Mix (New England Biolabs) was used for PCR amplification. Primer  
42 combinations for overlap extension PCR are listed in **Table S2**. Briefly, NIID0345 or AfS35  
43 genomic DNA was used as a template to generate overlapping PCR products with the  
44 corresponding site-specific mutations or junctions between *cyp51A* and the *hph* marker. The  
45 overlapping PCR products were mixed together and used as a template in the PCR-sewing  
46 step using the primers LFH1 and LFH4. Overlapping PCR product combinations are listed in  
47 **Table S3**. The fused PCR products were purified using a NucleoSpin® Gel and PCR Clean-  
48 up kit (Takarabio, Japan) and used for *A. fumigatus* protoplast transformation.

49

50 ***A. fumigatus* transformation.** *A. fumigatus* protoplasts were generated and fungal  
51 transformation was performed as previously described (1), with slight modifications. Briefly,  
52 conidia were incubated in YG medium for 6 h at 37°C. Following incubation, the cell walls  
53 of germlings were digested with 0.2 g/mL VinoTaste Pro (Novozymes, Denmark) for 1 h at

54 30°C; 20 pmol Cas9-NLS protein (New England Biolabs) and 10 pmol each *in vitro*-  
55 synthesized sgRNA1 and sgRNA2 were mixed and incubated for 25 min, generating  
56 ribonucleoproteins (RNPs). Protoplasts were transformed with 2–3 µg of repair templates and  
57 RNPs and plated onto CD supplemented with 1 M sucrose. Using NIID0345 clinical isolate  
58 as a host, repair templates 0345-mut1-S138-K248-mut2-hph, 0345-mut1-G138-K248-mut2-  
59 hph, 0345-mut1-S138-N248-mut2-hph, or 0345-mut1-G138-N248-mut2-hph were used to  
60 generate strains NIID0345-mut1-2, NIID0345-S138G, NIID0345-K248N, or NIID0345-S138G-  
61 K248N, respectively. Using AfS35 strain as a host, repair templates 35-mut1-G138-mut2-hph  
62 or 35-mut1-S138-mut2-hph were used to generate strains AfS35-mut1-2 or AfS35-G138S,  
63 respectively. Following a 15-h incubation at 37°C, plates were overlaid with CD top agar  
64 containing 400 µg/mL hygromycin. Positive colonies were confirmed by colony PCR using  
65 KOD FX Neo DNA polymerase (TOYOBO, Japan) with the primers Discheck5 and  
66 Discheck3 (which were designed at the region outside the repair template sequence),  
67 followed by nucleotide sequencing of *cyp51A*, including the promoter region.

68

69 **Antifungal susceptibility testing.** Susceptibility to VRC, ITC, and POS were evaluated with  
70 Etest strips according to the manufacturer's instruction (Biomerieux, France). Strains were  
71 grown at 37°C, and growth inhibition was visually evaluated after 48 h. Strains with an MIC  
72 >0.25 µg/mL for POS were considered resistant according to the epidemiological cutoff  
73 values (ECVs) for Etest proposed by Espinel-Ingroff et al. (3). Because ECVs for VRC and  
74 ITC have not been established for Etest, strains with an MIC >1 µg/mL for VRC and ITC  
75 were considered resistant according to CLSI ECVs proposed by Espinel-Ingroff et al. (4).  
76 Susceptibility tests were performed in three independent *Cyp51A*-sequence-confirmed  
77 transformants for each strain.

78

79

80 **Table S1. Oligonucleotide primers used in this study.**

| Primer    | Sequence (5'-3') <sup>a</sup>                                            | Orientation | Use                                                    |
|-----------|--------------------------------------------------------------------------|-------------|--------------------------------------------------------|
| Discheck5 | ATGCAGTGAAAAATTCCTAGCAG                                                  | Sense       | cyp51A amplification and verification of transformants |
| Discheck3 | ATGGTGGTGGTCAAGGTTTCAGCAG                                                | Antisense   | cyp51A amplification and verification of transformants |
| T7-sgRNA1 | <u>TTCTAATACGACTCACTATAGCTATGGCTTACGGCCT</u><br><u>ACAGTTTTAGAGCTAGA</u> | Sense       | in vitro sgRNA synthesis                               |
| T7-sgRNA2 | <u>TTCTAATACGACTCACTATAGGGATGAATAGTCAGTT</u><br><u>TCAGTTTTAGAGCTAGA</u> | Antisense   | in vitro sgRNA synthesis                               |
| LFH1      | GCGAGCCATGCTGGGAGGAATCTC                                                 | Sense       | Repair template construction and amplification         |
| Mut1-3    | CGGCCATATACGCGGTAAGCCATAGCATCGGCAC                                       | Antisense   | Repair template construction                           |
| Mut1-5    | GGCTTACCGGTATATGGCCGTTGCGGTGCTGAC                                        | Sense       | Repair template construction                           |
| G138-3    | TGAGTCAAGCCGTACTTGATGAACCTTTTTCTGCTC                                     | Antisense   | Repair template construction                           |
| G138-5    | CATCAAGTACGGCTTGACTCAGTCTGCGTTAGAG                                       | Sense       | Repair template construction                           |
| S138-3    | TGAGTCAAGCTGTACTTGATGAACCTTTTTCTGCTC                                     | Antisense   | Repair template construction                           |
| S138-5    | CATCAAGTACAGCTTGACTCAGTCTGCGTTAGAG                                       | Sense       | Repair template construction                           |
| N248-3    | GACGGCGCTGATTGATGATGCAACGTAGATTGAC                                       | Antisense   | Repair template construction                           |
| N248-5    | ACATCATCAATCAGCGCCGTTGACGGTGACAAG                                        | Sense       | Repair template construction                           |
| Mut2-3    | AGTCAGTCTCTGGCACTCCTTTCTTTCCATCCAC                                       | Antisense   | Repair template construction                           |
| Mut2-5    | AAGGAGTGCCAGAGACTGACTATTCATCCCTC                                         | Sense       | Repair template construction                           |
| LFH6      | GATATCGGCCTGAGTGGCCTCCAGGTTTTTCGCACGA<br>GCTTCTCC                        | Antisense   | Repair template construction                           |
| LFH3      | GTTGTGACGCGCCATCTAGGCCAGTTTTTGATAGTCT<br>TCAAAAGTCAG                     | Sense       | Repair template construction                           |
| LFH4      | CGTATTGGTGGAGCTGATGATCATC                                                | Antisense   | Repair template construction and amplification         |
| Hph5      | GAGGCCACTCAGGCCGATATCACC                                                 | Sense       | hph cassette amplification                             |
| Hph3      | CTGGCCTAGATGGCCGTCGACAAC                                                 | Antisense   | hph cassette amplification                             |
| proseq3   | TTAGTAATTAGGCAACTTTCATTC                                                 | Antisense   | cyp51A sequencing                                      |
| seq1      | CCAATGGTCTTTCATTGGGTC                                                    | Sense       | cyp51A sequencing                                      |
| seq1r     | TCCCGTAACTGATGGTACTAC                                                    | Antisense   | cyp51A sequencing                                      |
| seq2      | TTTACCGCTGCTCGAGCCCTC                                                    | Sense       | cyp51A sequencing                                      |
| seq2r     | GGAACGAACTTCCTGGCCTTG                                                    | Antisense   | cyp51A sequencing                                      |
| seq3      | AACTTCCCTTCCATCAACATG                                                    | Sense       | cyp51A sequencing                                      |
| seq3r     | CGAATAACATGTTGATGGAAG                                                    | Antisense   | cyp51A sequencing                                      |

81 <sup>a</sup> Letters in bold indicate the mutated nucleotide. Underlining indicates an additional

82 sequence for in vitro gRNA synthesis.

83 **Table S2. Combination of primers for overlapping PCR used in this study.**

| Name of PCR product | Primers       | Template DNA         |
|---------------------|---------------|----------------------|
| 0345-A              | LFH1/Mut1-3   | NIID0345 genomic DNA |
| 0345-mut1-G138      | Mut1-5/G138-3 | NIID0345 genomic DNA |
| 0345-mut1-N248      | Mut1-5/N248-3 | NIID0345 genomic DNA |
| 0345-mut1-mut2      | Mut1-5/Mut2-3 | NIID0345 genomic DNA |
| 0345-G138-mut2      | G138-5/Mut2-3 | NIID0345 genomic DNA |
| 0345-G138-N248      | G138-5/N248-3 | NIID0345 genomic DNA |
| 0345-N248-mut2      | N248-3/Mut2-3 | NIID0345 genomic DNA |
| 0345-C              | Mut2-5/LFH6   | NIID0345 genomic DNA |
| 0345-B              | LFH3/LFH4     | NIID0345 genomic DNA |
| 35-A                | LFH1/Mut1-3   | AfS35 genomic DNA    |
| 35-mut1-mut2        | Mut1-5/Mut2-3 | AfS35 genomic DNA    |
| 35-mut1-S138        | Mut1-5/S138-3 | AfS35 genomic DNA    |
| 35-S138-mut2        | S138-5/Mut2-3 | AfS35 genomic DNA    |
| 35-C                | Mut2-5/LFH6   | AfS35 genomic DNA    |
| 35-B                | LFH3/LFH4     | AfS35 genomic DNA    |
| Hph                 | Hph5/Hph3     | pHph plasmid DNA     |

84

85 **Table S3. Combination of PCR products for repair template amplification used in this**  
86 **study.**

| Name of repair template      | PCR products                                                                   |
|------------------------------|--------------------------------------------------------------------------------|
| 0345-mut1-S138-K248-mut2-hph | 0345-A, 0345-mut1-mut2, 0345-C, Hph, 0345-B                                    |
| 0345-mut1-G138-K248-mut2-hph | 0345-A, 0345-mut1-G138, 0345-G138-mut2, 0345-C, Hph, 0345-B                    |
| 0345-mut1-S138-N248-mut2-hph | 0345-A, 0345-mut1-N248, 0345-N248-mut2, 0345-C, Hph, 0345-B                    |
| 0345-mut1-G138-N248-mut2-hph | 0345-A, 0345-mut1-G138, 0345-G138-N248, 0345-N248-mut2,<br>0345-C, Hph, 0345-B |
| 35-mut1-G138-mut2-hph        | 35-A, 35-mut1-mut2, 35-C, Hph, 35-B                                            |
| 35-mut1-S138-mut2-hph        | 35-A, 35-mut1-S138, 35-S138-mut2, 35-C, Hph, 35-B                              |

87

88 **References**

89

90 1. **Szewczyk E, Nayak T, Oakley CE, Edgerton H, Xiong Y, Taheri-Talesh N, Osmani**  
91 **SA, Oakley BR, Oakley B.** 2006. Fusion PCR and gene targeting in *Aspergillus*  
92 *nidulans*. *Nat Protoc* **1**:3111–3120.

93 2. **Krappmann S, Sasse C, Braus GH.** 2006. Gene targeting in *Aspergillus fumigatus* by  
94 homologous recombination is facilitated in a nonhomologous end- joining-deficient  
95 genetic background. *Eukaryotic Cell* **5**:212–215.

96 3. **Espinel-Ingroff A, Turnidge J, Alastruey-Izquierdo A, Dannaoui E, Garcia-Effron**  
97 **G, Guinea J, Kidd S, Pelaez T, Sanguinetti M, Meletiadiis J, Botterel F, Bustamante**  
98 **B, Chen YC, Chakrabarti A, Chowdhary A, Chryssanthou E, Cordoba S, Gonzalez**  
99 **GM, Guarro J, Johnson EM, Kus JV, Lass-Florl C, Linares-Sicilia MJ, Martín-**  
100 **Mazuelos E, Negri CE, Pfaller MA, Tortorano AM.** 2018. Posaconazole MIC  
101 Distributions for *Aspergillus fumigatus* Species Complex by Four Methods: Impact of  
102 *cyp51A* Mutations on Estimation of Epidemiological Cutoff Values. *Antimicrobial*  
103 *Agents and Chemotherapy* **62**:e01916–17.

104 4. **Espinel-Ingroff A, Diekema DJ, Fothergill A, Johnson E, Pelaez T, Pfaller MA,**  
105 **Rinaldi MG, Cantón E, Turnidge J.** 2010. Wild-type MIC distributions and  
106 epidemiological cutoff values for the triazoles and six *Aspergillus* spp. for the CLSI  
107 broth microdilution method (M38-A2 document). *Journal of Clinical Microbiology*  
108 **48**:3251–3257.

109
